# Supplementary material for: Postoperative Bile Leakage and Anastomotic Stricture After Roux en Y Hepaticojejunostomy: A Retrospective Analysis of Risk Factors
Source: Research Square preprint supplement (doi:10.21203/rs.3.rs-1336479/v2), 2022-05-02
Supplement: Supplementary file 1 [file 2bd267003fae1048220668f3.docx]

**Table 1 Demographic and preoperative characteristics**

| **Variable** | **Result** |  |
| --- | --- | --- |
| ***Demographics*** |  |  |
| Gender *n(%)* |  |  |
| Male | 87 (43.72) |  |
| Female | 112 (56.28) |  |
| Age ** | 61.73 (14.93) |  |
| Body mass index - Kg/m2 **** | 24.41 (5.86) |  |
| **Pre-operative laboratory** |  |  |
| Preoperative total bilirrubin * | 7.29 (35;125) |  |
| Preoperative AST * | 114.9 (32;116) |  |
| Preoperative ALT **** | 162.3 (188.98) |  |
| Preoperative alkaline phosphatase **** | 491.06 (424.49) |  |
| **ASA n (%)** |  |  |
| I | 24 (12.06) |  |
| II | 67 (33.67) |  |
| III | 103 (51.76) |  |
| IV | 5 (2.51) |  |
| **Comorbidities n(%)** |  |  |
| Arterial Hypertension | 89 (44.72) |  |
| Type 2 Diabetes Mellitus | 33 (16.58) |  |
| **Pre-operative characteristics** |  |  |
| Previous Bilioenteric Anastomosis | 5 (2.54) |  |
| Preoperative cholangitis | 19 (9.55) |  |
| Preoperative endoscopic derivation | 35 (17.59) |  |
| Preoperative percutaneous derivation | 6 (3.02) |  |
| **Etiology n (%)** |  |  |
| Iatrogenic Bile duct injury | 40 (20.10) |  |
| Palliative derivation | 6 (3.02) |  |
| Pancreatic cancer | 104 (52.26) |  |
| Hepatectomy related | 1 (0.5) |  |
| Bile duct tumor | 16 (8.04) |  |
| Periampullary tumors | 31 (15.58) |  |
| Anastomosis stricture | 1 (0.5) |  |
| **** Variables with skewed distributed data, presented with IQR***  ***** Variables with normally distributed data, presented with mean (SD)*** |  |  |

**Table 2. Intraoperative characteristics**

| **Variable** | **Result n(%)** |  |
| --- | --- | --- |
| Anastomosis |  |  |
| Conventional Roux-En-Y Hepaticojejunostomy | 198 (99.5) |  |
| Hepp- Couinaud | 1 (0.5) |  |
| Vascular compromise | 13 (7.18) |  |
| Intraoperative chemotherapy | 0 (0) |  |
| Strassberg classification |  |  |
| C | 1 (2.7) |  |
| D | 4 (10.81) |  |
| E1 | 8 (21.62) |  |
| E2 | 12 (32.43) |  |
| E3 | 7(18.92) |  |
| E4 | 5 (13.51) |  |
|  |  |  |
| Operative time | 253.03 (81.29) |  |
| Intraoperative Bleeding * | 417.81 (120;1200) |  |
| *** Variables with skewed distributed data, presented with IQR** |  |  |

**Table 3 Postoperative complications and follow up**

| **Variable** | **Result** |
| --- | --- |
| Blood transfusion | 28 (14.07) |
| Surgical site infection | 10 (5.03) |
| Bilioma | 6 (3.06) |
| Anastomotic leak | 9 (4.02) |
| Postoperative complications |  |
| None | 129 (64.82) |
| Pulmonary trombo-embolism | 6 (3.06) |
| Atelectasis | 4 (2.01) |
| Postoperative bleeding | 25 (12.56) |
| Postoperative sepsis | 17 (8.54) |
| Electrolytic impairment | 3 (1.51) |
| Intra abdominal collection | 13 (6.53) |
| Bronco-aspiration | 2 (1.01) |
| Percutaneous drainage | 13 (6.53) |
| Re-intervention | 17 (8.54) |
| Postoperative mortality | 9 (4.52) |
| 4 year anastomosis stricture | 9 (4.52) |

**Table 4. Comparison between malignant and benign disease**

| **Variable (n)** | **Malignant Disease** | **Benign Condition** |
| --- | --- | --- |
| Surgical Site infection | 8 | 2 |
| Bilioma | 1 | 5 |
| Anastomotic leak | 8 | 1 |
| 4 year anastomosis stricture | 2 | 7 |
| Blood transfusion | 26 | 1 |
| Re-intervention | 15 | 2 |
| Mortality | 8 | 1 |

**Table 5 Statistical Analys**

**​​**

| **Variables - p value** | **Mortality** | **Re-intervention** | **Surgical site infection** | **Anastomotic leak** | **Anastomosis** |
| --- | --- | --- | --- | --- | --- |
|  |  | **stricture at 4** |
| **year** |
| **Type 2 Diabet0.0es Mellitus** | 0.9 | 0.99 | 0.99 | 0.3 | 0.5 |
| **Previous anastomosis** | 0.998 | 0.99 | 0.18 | 1.0 | 1.0 |
| **Benign diagnosis** | 0.483 | 0.32 | 0.65 | 0.7 | ***0.001*** |
| **Preoperative cholangitis** | 0.996 | 0.815 | 0.94 | 0.93 | 1.0 |
| **Requirement of blood transfusion** | 0.58 | 0.79 | 0.7 | 1 | 1.0 |
|  | 1 |
| **Body Mass Index < 23 kg/m2** | 0.7 | 0.65 | 0.45 | 0.5 | 1.0 |
| **Body Mass Index 23.1 - 26.9 kg/m2** | 0.1 | 0.8 | 1.0 | 1.0 | 0.9 |
| **Body Mass Index 27 – 30 kg/m2** | 0.8 | 0.55 | 0.7 | **0.002** | 0.6 |
| **Body Mass Index > 30 kg/m2** | 0.99 | 0.6 | 0.6 | **0.01** | 1.0 |
